# Supplementary material for: Malaria and protective behaviours: is there a malaria trap?
Source: Malar J. 2013 Jun 13;12:200. doi: 10.1186/1475-2875-12-200 (PMC3691867; doi:10.1186/1475-2875-12-200)
Supplement: Additional file 1 — Imperfect efficiency of ITN. [file 1475-2875-12-200-S1.pdf]

## Appendix: Imperfect efficiency of ITN

To take account of the imperfect efficiency of ITNs and LLINs, two definitions of efficiency are required.

**First**, the direct efficiency is defined as the probability of not being infected when using an ITN/LLIN. This parameter is termed  $\phi_1$  where  $\phi_1 \leq 1$  and for perfect efficiency  $\phi_1 = 1$ .

The probability of being infected when using an ITN/LLIN is, therefore,  $(1 - \phi_1)\pi_I$  and the result of utility maximization becomes:

$h = 1$  if and only if

$$(1 - (1 - \phi_1)\pi_I)u(S) + (1 - \phi_1)u(I) - (1 - \pi_I)u(S) - \pi_I u(S) \geq \kappa W(\omega) \quad (21)$$

Hence

$$h = 1 \text{ if and only if } \pi_I \geq \frac{C(\omega)}{\phi_1} \quad (22)$$

In addition, equation (6) becomes:

$$X = (1 - \phi_1 H)\pi_I \quad (23)$$

The effect of ITN efficiency can then be described by calculating the effect of  $\phi_1$  on  $X$ , by

solving the following system at steady state for a variation of  $\phi_1$ :

$$\begin{cases} \pi_i = Q(X, m(H)) \\ X = (1 - \phi_1 H)\pi_i \\ H = 1 - F(C^{-1}(\phi_1 \pi_I)) \end{cases} \quad (24)$$

And thus,

$$\begin{cases} d\pi_i = \frac{\partial Q}{\partial X} dX + m' \frac{\partial Q}{\partial m} dH \\ dX = (1 - \phi_1 H)d\pi_i - \phi_1 \pi_i dH - H\pi_i d\phi_1 \\ dH = -\frac{f}{c'} \phi_1 d\pi_i - \frac{f}{c'} \pi_i d\phi_1 \end{cases} \quad (25)$$

Note that increasing  $\phi_1$  in the second and third equations (i.e. in  $dX$  and  $dH$ ) leads to an increase in  $H$  and a decrease in  $X$  (knowing that  $f > 0$  and  $c' < 0$ ) for a given  $\pi_i$ , and increasing  $H$  and decreasing  $X$  in the first equation ( $d\pi_i$ ) lead to an increase in  $\pi_i$ , which enforces the

first effect. Hence for all values of  $\pi_I$ ,  $X$  decreases with  $\phi_1$ . Consequently, the possibility of a malaria trap is reinforced.

**Second**, the efficiency concerns the beliefs with respect to ITN efficiency: the expected probability of not being infected when using an ITN. This parameter is termed  $\phi_2$  where  $\phi_2 \leq \phi_1$  and for expectation of perfect efficiency  $\phi_2 = \phi_1$ . Then the expected probability of being infected when using an ITN is  $(1 - \phi_2)\pi_I$  and the result of utility maximization becomes:

$h = 1$  if and only if:

$$(1 - (1 - \phi_2)\pi_I)u(S) + (1 - \phi_2)u(I) - (1 - \pi_I)u(S) - \pi_I u(S) \geq \kappa W(\omega) \quad (26)$$

Therefore

$$h = 1 \text{ if and only if } \pi_I \geq \frac{C(\omega)}{\phi_2} \quad (27)$$

However, there is no change in equation (6), as steady state infection is determined by the probability of being infected at steady state:

$$\begin{cases} \pi_i = Q(X, m(H)) \\ X = (1 - H)\pi_i \\ H = 1 - F(C^{-1}(\phi_2\pi_I)) \end{cases} \quad (28)$$

The effect of beliefs about ITN efficiency can then be described by calculating the effect of  $\phi_2$  on  $X$  for a given level  $\pi_I$ , thus solving the following system:

$$\begin{cases} d\pi_i = \frac{\partial Q}{\partial X} dX + m' \frac{\partial Q}{\partial m} dH \\ dX = (1 - H)d\pi_i - \pi_i dH - H\pi_i \\ dH = -\frac{f}{c'} \phi_2 d\pi_i - \frac{f}{c'} \pi_i d\phi_2 \end{cases} \quad (29)$$

Note that increasing  $\phi_2$  in the third equations (i.e. in  $dH$ ) leads to an increase in  $H$  and thus a decrease in  $X$  in the second equation for a given  $\pi_i$ . As before, increasing  $H$  and decreasing  $X$  in the first equation ( $d\pi_i$ ) lead to an increase in  $\pi_i$ , which enforces the first effect. Hence for all values of  $\pi_I$ ,  $X$  decreases with  $\phi_2$ . Consequently, the possibility of a malaria trap is reinforced.
